# Supplementary material for: An automatic integrated microfluidic system for allergy microarray chips
Source: Royal Society of Chemistry journal article supplement (doi:10.1039/c8an00247a), 2018-01-01
Supplement: c8an00247a2.pdf [file c8an00247a2.pdf]

## Supplemental information

### An automatic integrated microfluidic system for allergy microarray chips

Wen-Yen Huang<sup>a</sup>, Shang-Ta Chou<sup>a</sup>, Chia-Hui Chen<sup>d</sup>, Shan-Ying Chou<sup>b</sup>, Jia-Han Wu<sup>a</sup>, Yu-Chen Chen<sup>d</sup>  
and Gwo-Bin Lee<sup>a, b, c\*</sup>

<sup>a</sup>Department of Power Mechanical Engineering, National Tsing Hua University, Hsinchu, Taiwan  
30013

<sup>b</sup> Institute of Biomedical Engineering, National Tsing Hua University, Hsinchu, Taiwan 30013.

<sup>c</sup>Institute of NanoEngineering and Microsystems, National Tsing Hua University, Hsinchu, Taiwan  
30013

<sup>d</sup>R&D department, Excelsior Bio-System, Inc., Taipei, Taiwan 11471

\*E-mail: gwobin@pme.nthu.edu.tw; Fax: +886-3-5742495; Tel: +886-3-5715131 Ext. 33765

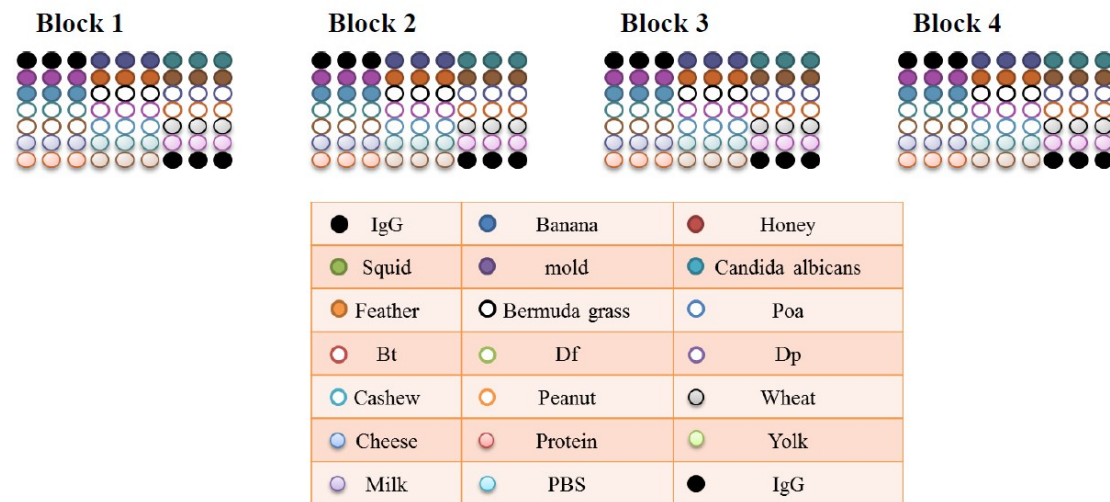

**Fig. S1.** Illustrations of the allergy microarray chip. There were four identical blocks, each containing twenty kinds of allergens (or control immunoglobulin G [IgG] spots) in triplicate spots. Poa, allergens from *Poa annua*; Bt, allergens from *Bacillus thuringiensis*; Df and Dp, Der p and Der F peptidases from mites; PBS, phosphate buffered saline.

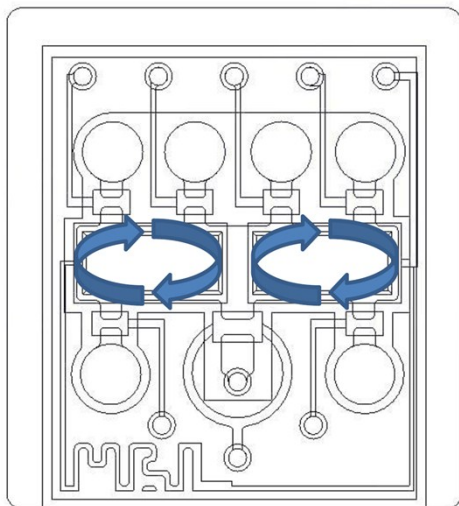

**Fig. S2.** Illustration of the vortex flows generated in the micropump. The video was available online: <http://xxxxxx>

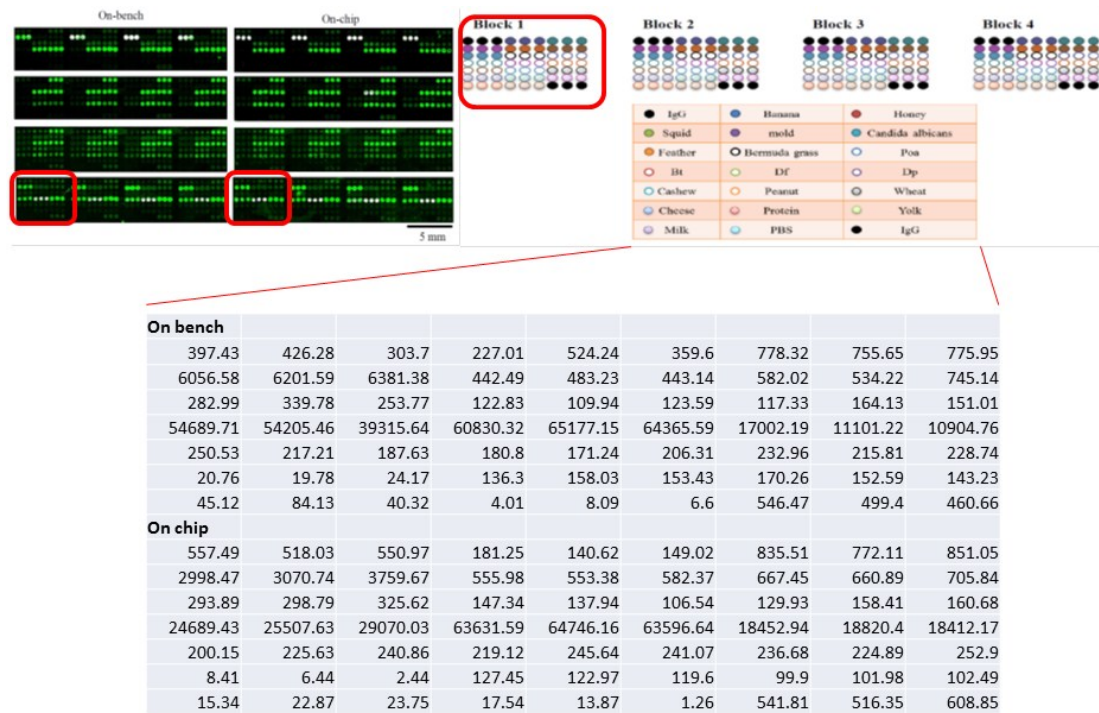

**Fig. S3.** The fluorescence intensities (a. u.) from Fig. 10. The raw data of spots in block 1 area in the fourth test (red rectangle; bottom row) were shown. The fluorescence intensities (a. u.) were almost comparable between the on-bench and on-chip tests.

Table S1. Methods comparison.

| Sequential procedure                                                       | On bench (time) | On chip (time)                    | Note    |
|----------------------------------------------------------------------------|-----------------|-----------------------------------|---------|
| 1. Serum-allergen hybridization                                            | 30 min          | 30, 20, or 15 min                 |         |
| 2. Remove slides from a shaker, briefly dry, put it back, and add reagents | ~2 min          | N/A                               |         |
| 3. Wash                                                                    | 5 min           | 5 min                             | 3 times |
| 4. Remove slides from a shaker, briefly dry, put it back, and add reagents | ~2 min          | N/A                               | 3 times |
| 5. 2 <sup>nd</sup> antibody hybridization                                  | 30 min          | 30, 20, or 15 min                 |         |
| 6. Remove slides from a shaker, briefly dry, put it back, and add reagents | ~2 min          | N/A                               |         |
| 7. Wash                                                                    | 5 min           | 5 min                             | 3 times |
| 8. Remove slides from a shaker, briefly dry, put it back, and add reagents | ~ 2 min         | N/A                               | 3 times |
| 9. RO rinse                                                                | 2 min           | 2 min                             | 2 times |
| Total                                                                      | ~110 min        | 94, 74, or 64 min                 |         |
| Time reduction                                                             |                 | ~15%, ~33%, or ~42%, respectively |         |
